# Supplementary material for: Long-term genomic coevolution of host-parasite interaction in the natural environment
Source: PubMed Central journal article supplement (PMC5524643; doi:10.1038/s41467-017-00158-7), 2017-07-24
Supplement: 41467_2017_158_MOESM1_ESM.pdf [file 41467_2017_158_MOESM1_ESM.pdf]

**File name:** Supplementary Information

**Description:** Supplementary Figures, Supplementary Tables, Supplementary Discussion and Supplementary References

**File name:** Supplementary Data 1

**Description:** CRISPR spacer sequences and Blast hits.

**File name:** Peer Review File

**Description:**

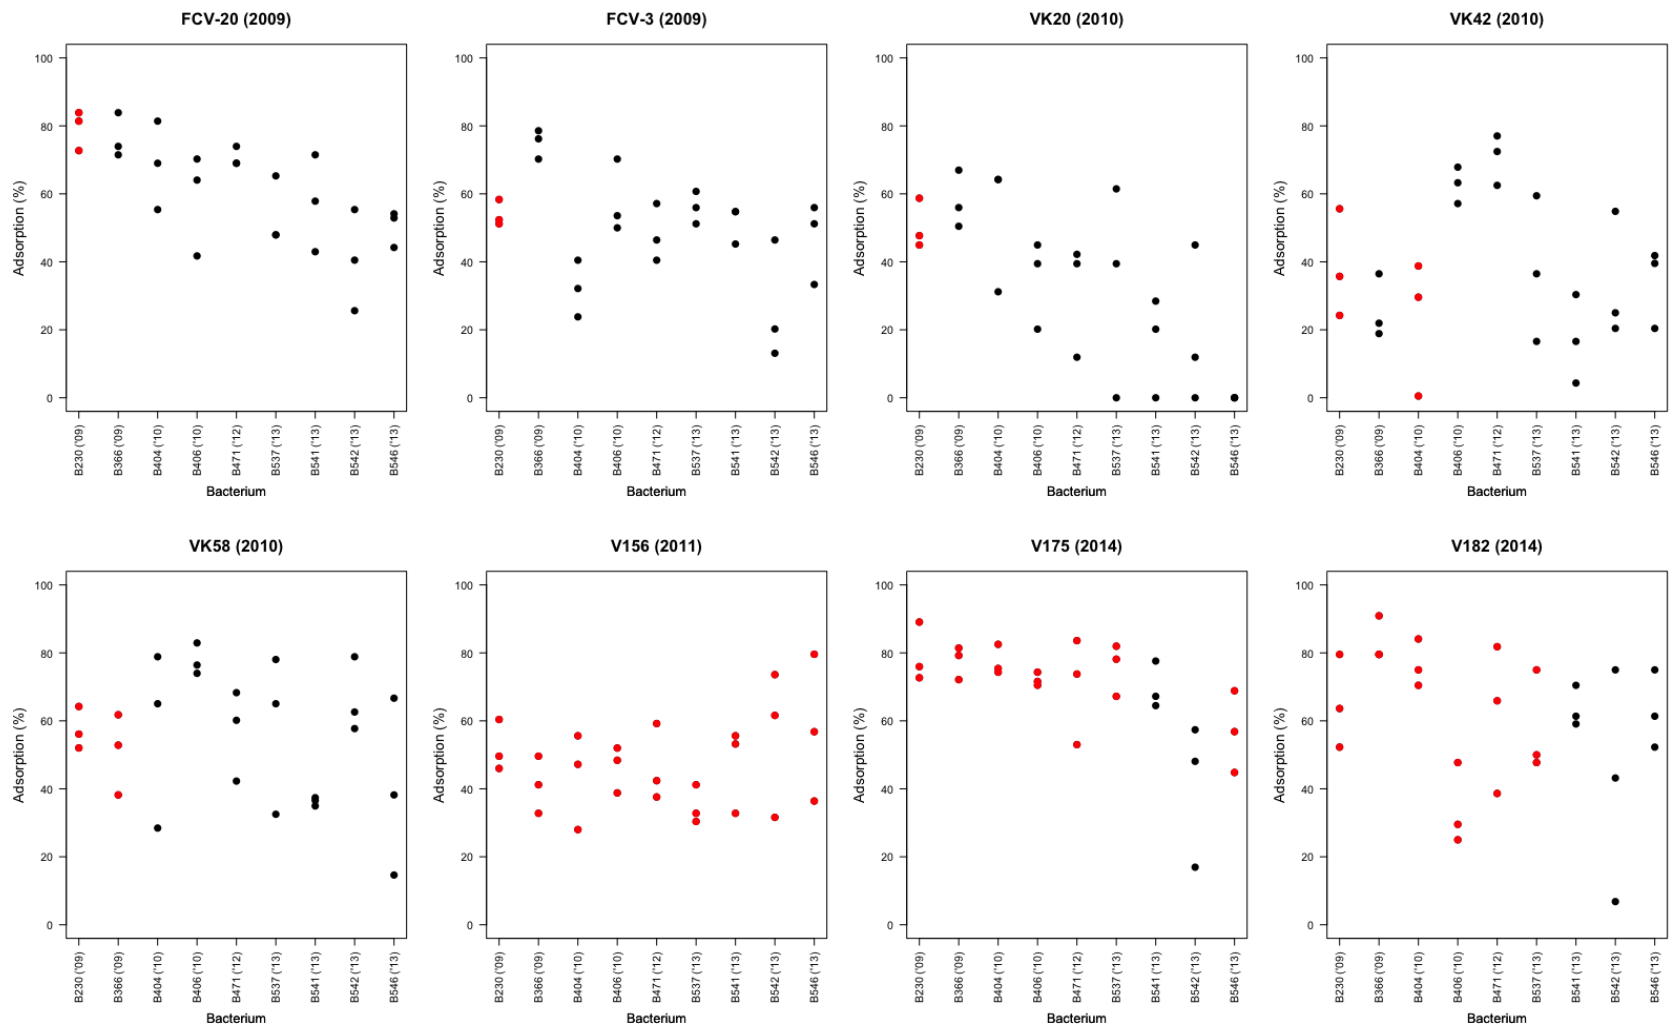

**Supplementary Figure 1.** Percentage of phage adsorption on bacterial hosts isolated in different years. Red dots represent (individual values of) adsorption on susceptible hosts (see Fig. 2 in the main text) and black dots adsorption on resistant hosts. Assay was done in three replicates.

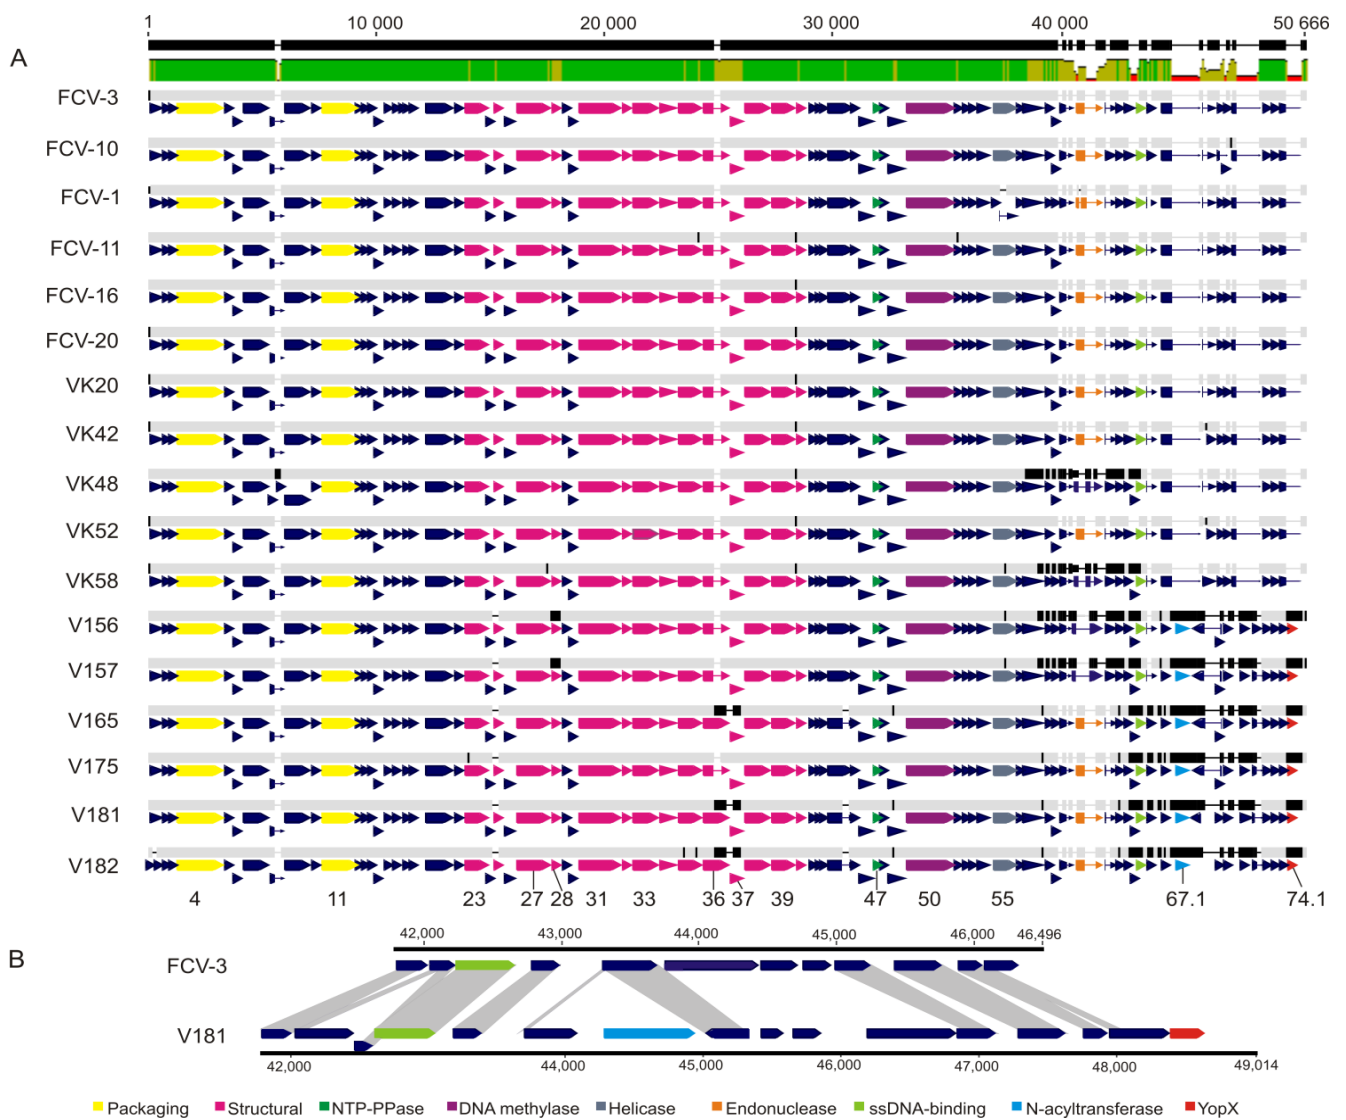

**Supplementary Figure 2.** (A) The genome alignment shows predicted open reading frames (ORFs). Numbers underneath the alignment indicate the assigned number of some of the ORFs. ORFs with putative function are marked with colors indicating the functions shown in the bottom of **B**. In the consensus sequence bar above the genomes, green color indicates 100% identical DNA-sequences, yellow 30% and red < 30% identity respectively. Note that also the bar height changes accordingly. (B) A closeup to the end of genomes FCV-3 and V181 where the 100% identity between the ORFs is shown in grey.

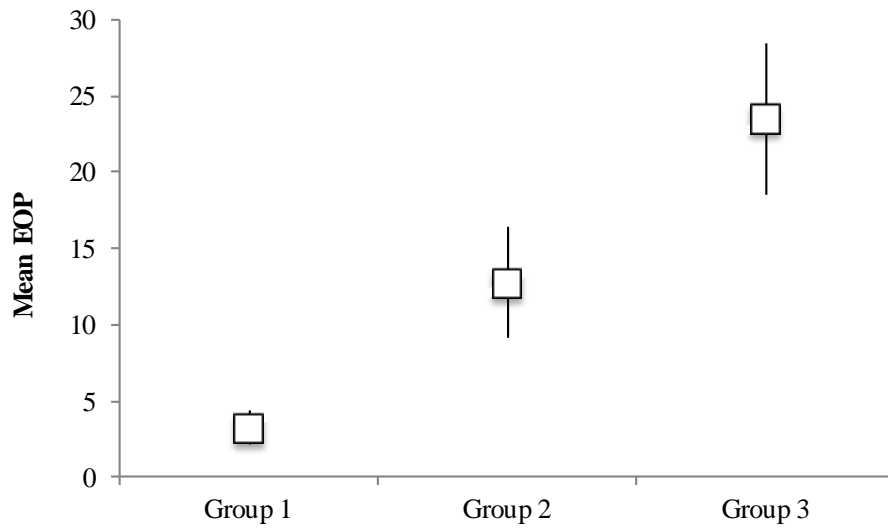

**Supplementary Figure 3.** Mean efficiency of plating (EOP, phage titers in relation to host B230, Supplementary Table 3) of phages belonging to genomic group 1, 2 and 3 (see Fig. 2 in the main text) in all bacterial hosts (+/- S.E.M.)

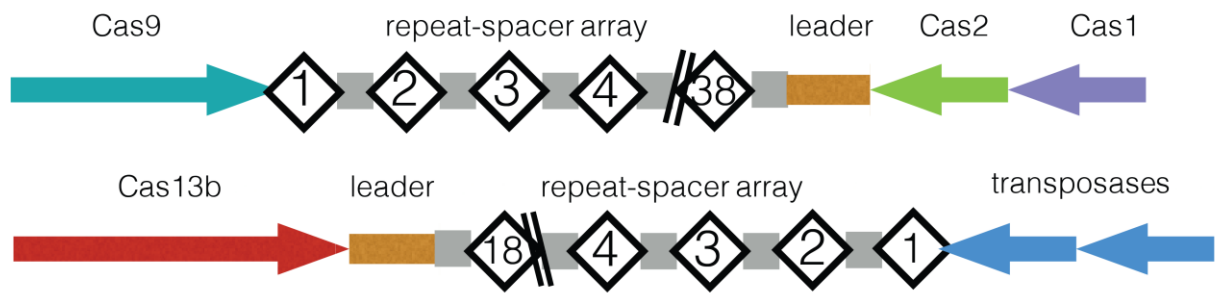

**Supplementary Figure 4.** Diagrams of CRISPR1 (top) and CRISPR2 (below) loci.

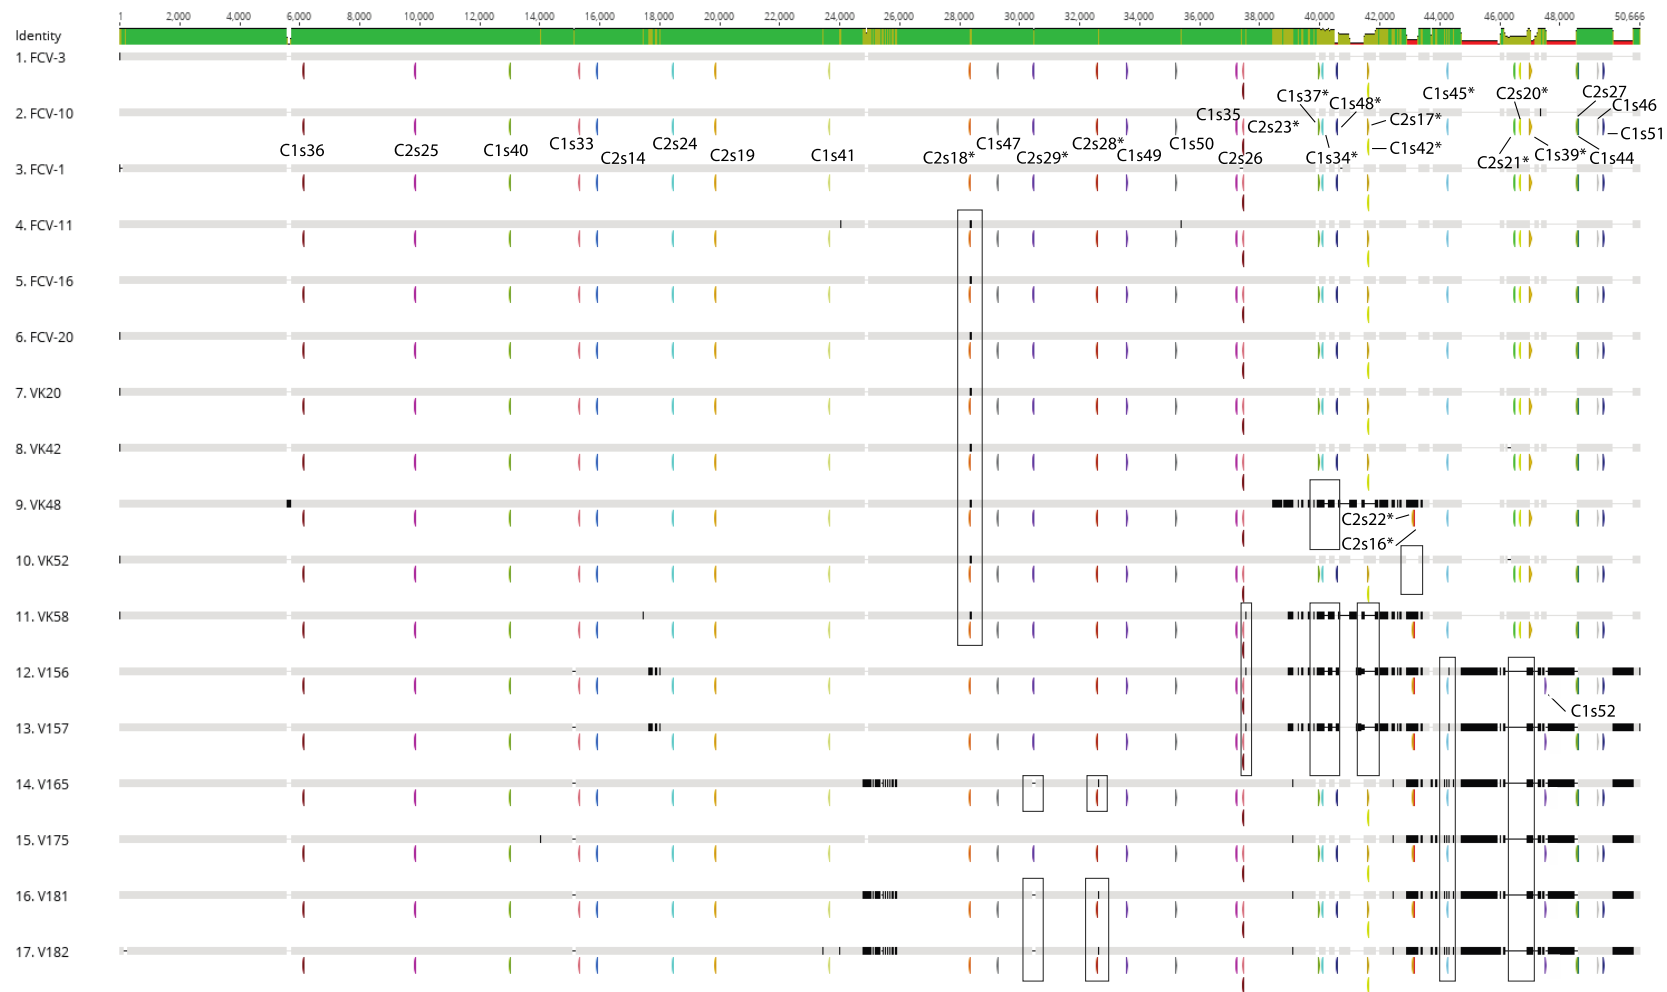

**Supplementary Figure 5.** Location of protospacers in the phage genomes. Protospacers that have variation among the phage genomes are marked with an asterisk and these corresponding changes are marked with rectangles in the protospacer areas (one rectangle may include multiple protospacers). Color coding only highlights similar protospacers in different phages and does not correspond to colors in Fig. 2a.

**Supplementary Table 1.** *Flavobacterium columnare* isolates used in this study. All isolates belong to the genetic group C.

| <b>Bacterial isolate</b> | <b>Date of isolation</b>     | <b>Source</b> |
|--------------------------|------------------------------|---------------|
| B425                     | 14 <sup>th</sup> August 2007 | rainbow trout |
| B447                     | 14 <sup>th</sup> August 2007 | tank water    |
| B230                     | 30 <sup>th</sup> June 2009   | outlet water  |
| B235                     | 7 <sup>th</sup> July 2009    | tank water    |
| B236                     | 7 <sup>th</sup> July 2009    | tank water    |
| B237                     | 7 <sup>th</sup> July 2009    | tank water    |
| B245                     | 14 <sup>th</sup> July 2009   | tank water    |
| B339                     | 5 <sup>th</sup> July 2010    | outlet water  |
| B366                     | 2 <sup>nd</sup> August 2010  | outlet water  |
| B397                     | 21 <sup>st</sup> June 2010   | inlet water   |
| B404                     | 2 <sup>nd</sup> August 2010  | inlet water   |
| B406                     | 16 <sup>th</sup> August 2010 | inlet water   |
| B471                     | 12 <sup>th</sup> July 2012   | rainbow trout |
| B537                     | 28 <sup>th</sup> June 2013   | rainbow trout |
| B541                     | 8 <sup>th</sup> August 2013  | rainbow trout |
| B542                     | 8 <sup>th</sup> August 2013  | rainbow trout |
| B546                     | 8 <sup>th</sup> August 2013  | rainbow trout |
| C1                       | 1997                         | Reference 1   |

**Supplementary Table 2.** Bacteriophage isolates used in this study

| Phage isolate | Date of isolation             | Source             | Enrichment host | Enrichment host isolation year | Phage genome size (bp) | Accession Number |
|---------------|-------------------------------|--------------------|-----------------|--------------------------------|------------------------|------------------|
| FCV-2         | 7 <sup>th</sup> July 2009     | tank water         | B235            | 2009                           |                        |                  |
| FCV-3         | 7 <sup>th</sup> July 2009     | tank water         | B236            | 2009                           | 46 496                 | KY951963         |
| V99           | 7 <sup>th</sup> July 2009     | tank water         | B237            | 2009                           |                        |                  |
| FCV-9         | 14 <sup>th</sup> July 2009    | tank water         | B245            | 2009                           |                        |                  |
| FCV-10        | 14 <sup>th</sup> July 2009    | tank water         | B247            | 2009                           | 46 482                 | KY979236         |
| FCV-1         | 22 <sup>nd</sup> July 2009    | tank water         | C1              | 1997                           | 46 450                 | KY979235         |
| FCV-11        | 22 <sup>nd</sup> July 2009    | outlet water       | C1              |                                | 46 481                 | KY951964         |
| FCV-16        | 25 <sup>th</sup> August 2009  | outlet water       | C1              |                                | 46 481                 | KY979237         |
| FCV-20        | 11 <sup>th</sup> August 2009  | outlet water       | C1              |                                | 46 469                 | KY979238         |
| VK16          | 5 <sup>th</sup> July 2010     | inlet water        | C1              |                                |                        |                  |
| VK20          | 5 <sup>th</sup> July 2010     | tank water         | C1              |                                | 46 496                 | KY979243         |
| VK42          | 2 <sup>nd</sup> August 2010   | tank water         | B339            | 2010                           | 46 455                 | KY979244         |
| VK46          | 2 <sup>nd</sup> August 2010   | tank water         | C1              |                                |                        |                  |
| VK48          | 2 <sup>nd</sup> August 2010   | tank water         | C1              |                                | 46 570                 | KY979245         |
| VK51          | 16 <sup>th</sup> August 2010  | inlet water        | C1              |                                |                        |                  |
| VK52          | 16 <sup>th</sup> August 2010  | tank water         | C1              |                                | 46 455                 | KY979246         |
| VK53          | 30 <sup>th</sup> August 2010  | outlet water       | C1              |                                |                        |                  |
| VK54          | 30 <sup>th</sup> August 2010  | eathren pond       | C1              |                                |                        |                  |
| VK58          | 11 <sup>th</sup> October 2010 | outlet water       | C1              |                                | 46 448                 | KY979247         |
| V156          | 4 <sup>th</sup> August 2011   | eathren pond       | C1              |                                | 48 564                 | KY979239         |
| V157          | 4 <sup>th</sup> August 2011   | inlet water        | B270            | 2009                           | 48 565                 | KY979240         |
| V158          | 4 <sup>th</sup> August 2011   | inlet water        | C1              |                                |                        |                  |
| V162          | 14 <sup>th</sup> August 2014  | outlet water       | B366            | 2010                           |                        |                  |
| V165          | 14 <sup>th</sup> August 2014  | inlet water        | B366            |                                | 49 013                 | KY979241         |
| V167          | 214 <sup>th</sup> August 014  | outlet water/river | B366            |                                |                        |                  |
| V171          | 22th August 2014              | inlet water        | B366            |                                |                        |                  |
| V175          | 22 <sup>nd</sup> August 2014  | outlet water       | B366            |                                | 49 016                 | KY992519         |
| V178          | 222 <sup>nd</sup> August 014  | outlet water/river | B366            |                                |                        |                  |
| V181          | 27 <sup>th</sup> August 2014  | inlet water        | B366            |                                | 49 014                 | KY992520         |
| V182          | 27 <sup>th</sup> August 2014  | outlet water       | B366            |                                | 49 099                 | KY979242         |



**Supplementary Table 3. (A) Phage plaque numbers in bacterial hosts and (B) efficiency of plating (EOP) calculated using strain B230 as a reference host.**

| A) Phage | B425  | B447  | B230  | B235  | B236  | B237  | B245  | B339  | B366  | B397  | B404  | B406  | B471  | B537  | B541  | B542  | B546  |
|----------|-------|-------|-------|-------|-------|-------|-------|-------|-------|-------|-------|-------|-------|-------|-------|-------|-------|
| FCV-2    | 0     | 0     | 1E+07 | 1E+07 | 1E+07 | 1E+08 | 1E+07 | 0     | 0     | 0     | 0     | 0     | 0     | 0     | 0     | 0     | 0     |
| FCV-3    | 0     | 0     | 1E+07 | 1E+07 | 1E+07 | 1E+08 | 1E+07 | 0     | 0     | 0     | 0     | 0     | 0     | 0     | 0     | 0     | 0     |
| V99      | 0     | 0     | 1E+07 | 1E+07 | 1E+07 | 1E+08 | 1E+07 | 0     | 0     | 0     | 0     | 0     | 0     | 0     | 0     | 0     | 0     |
| FCV-9    | 0     | 0     | 1E+08 | 1E+08 | 1E+08 | 1E+07 | 1E+08 | 0     | 0     | 0     | 0     | 0     | 0     | 0     | 0     | 0     | 0     |
| FCV-10   | 0     | 1E+06 | 1E+08 | 1E+08 | 1E+08 | 1E+07 | 1E+08 | 1E+06 | 0     | 0     | 0     | 0     | 0     | 0     | 0     | 0     | 0     |
| FCV-1    | 0     | 1E+06 | 1E+08 | 1E+08 | 1E+08 | 1E+09 | 1E+08 | 1E+06 | 0     | 0     | 0     | 0     | 0     | 0     | 0     | 0     | 0     |
| FCV-11   | 0     | 1E+06 | 1E+06 | 1E+06 | 1E+06 | 1E+06 | 1E+06 | 0     | 0     | 1E+06 | 0     | 0     | 0     | 0     | 0     | 0     | 0     |
| FCV-20   | 0     | 1E+09 | 1E+07 | 1E+07 | 1E+08 | 1E+08 | 1E+07 | 0     | 0     | 1E+08 | 0     | 0     | 0     | 0     | 0     | 0     | 0     |
| FCV-16   | 0     | 1E+07 | 1E+06 | 1E+06 | 1E+06 | 1E+07 | 1E+07 | 0     | 0     | 1E+07 | 0     | 0     | 0     | 0     | 0     | 0     | 0     |
| VK16     | 0     | 1E+07 | 1E+05 | 1E+05 | 1E+05 | 1E+06 | 1E+06 | 0     | 0     | 1E+07 | 0     | 0     | 0     | 0     | 0     | 0     | 0     |
| VK20     | 0     | 1E+07 | 1E+05 | 1E+06 | 1E+06 | 1E+06 | 1E+06 | 0     | 0     | 1E+07 | 0     | 0     | 0     | 0     | 0     | 0     | 0     |
| VK42     | 0     | 1E+07 | 1E+07 | 1E+06 | 1E+07 | 1E+06 | 1E+06 | 1E+08 | 0     | 1E+07 | 1E+08 | 0     | 0     | 0     | 0     | 0     | 0     |
| VK46     | 0     | 1E+08 | 1E+07 | 1E+06 | 1E+07 | 1E+06 | 1E+06 | 0     | 0     | 1E+08 | 0     | 0     | 0     | 0     | 0     | 0     | 0     |
| VK48     | 0     | 1E+08 | 1E+07 | 1E+07 | 1E+07 | 1E+07 | 1E+07 | 1E+07 | 0     | 1E+09 | 0     | 0     | 0     | 0     | 0     | 0     | 0     |
| VK51     | 0     | 1E+07 | 1E+07 | 1E+06 | 1E+06 | 1E+06 | 1E+07 | 0     | 1E+07 | 1E+07 | 0     | 0     | 0     | 0     | 0     | 0     | 0     |
| VK52     | 0     | 1E+07 | 1E+07 | 1E+07 | 1E+07 | 1E+08 | 1E+07 | 1E+07 | 0     | 1E+07 | 1E+08 | 0     | 0     | 0     | 0     | 0     | 0     |
| VK53     | 0     | 1E+07 | 1E+07 | 1E+05 | 1E+06 | 10000 | 1E+05 | 0     | 0     | 1E+08 | 0     | 0     | 0     | 0     | 0     | 0     | 0     |
| VK54     | 0     | 1E+06 | 1E+07 | 1E+06 | 1E+07 | 1E+07 | 1E+06 | 0     | 1E+07 | 1E+06 | 0     | 0     | 0     | 0     | 0     | 0     | 0     |
| VK58     | 0     | 1E+06 | 1E+07 | 1E+06 | 1E+07 | 1E+07 | 1E+06 | 0     | 1E+08 | 1E+08 | 0     | 0     | 0     | 0     | 0     | 0     | 0     |
| V156     | 1000  | 1E+08 | 1E+08 | 1E+07 | 1E+08 | 1E+09 | 1E+08 | 1E+09 | 1E+09 | 1E+09 | 1E+09 | 1E+08 | 1E+09 | 1E+09 | 1E+06 | 0     | 1E+07 |
| V157     | 0     | 1E+06 | 1E+05 | 10000 | 1E+05 | 1E+06 | 1E+06 | 1E+07 | 1E+07 | 1E+07 | 1E+07 | 1E+06 | 1E+07 | 1E+07 | 0     | 0     | 1E+06 |
| V158     | 0     | 1E+08 | 1E+08 | 1E+07 | 1E+09 | 1E+08 | 1E+08 | 1E+09 | 1E+09 | 1E+09 | 1E+09 | 1E+09 | 1E+09 | 1E+09 | 1E+06 | 0     | 1E+07 |
| V162     | 1E+08 | 1E+08 | 1E+07 | 1E+07 | 1E+09 | 1E+09 | 1E+07 | 1E+08 | 1E+09 | 1E+08 | 1E+09 | 1E+09 | 1E+09 | 1E+09 | 1E+08 | 1E+08 | 0     |
| V165     | 1E+08 | 1E+09 | 1E+07 | 1E+07 | 1E+09 | 1E+09 | 1E+07 | 1E+08 | 1E+09 | 1E+08 | 1E+09 | 1E+09 | 1E+09 | 1E+09 | 1E+07 | 1E+08 | 0     |
| V167     | 1E+08 | 1E+09 | 1E+07 | 1E+07 | 1E+09 | 1E+09 | 1E+08 | 1E+08 | 1E+09 | 1E+09 | 1E+08 | 1E+09 | 1E+09 | 1E+09 | 1E+06 | 1E+08 | 0     |
| V171     | 1E+08 | 1E+09 | 1E+06 | 1E+07 | 1E+07 | 1E+08 | 1E+06 | 1E+07 | 1E+09 | 1E+09 | 1E+08 | 1E+09 | 1E+09 | 1E+09 | 1E+07 | 1E+08 | 0     |
| V175     | 0     | 1E+09 | 1E+09 | 1E+07 | 1E+09 | 1E+09 | 1E+08 | 1E+09 | 1E+09 | 1E+09 | 1E+08 | 1E+09 | 1E+09 | 1E+09 | 0     | 0     | 1E+07 |
| V178     | 0     | 1E+09 | 1E+09 | 1E+07 | 1E+09 | 1E+09 | 1E+08 | 1E+09 | 1E+09 | 1E+09 | 1E+08 | 1E+09 | 1E+09 | 1E+09 | 0     | 0     | 1E+07 |
| V181     | 1E+07 | 1E+09 | 1E+07 | 1E+06 | 1E+08 | 1E+08 | 1E+07 | 1E+09 | 1E+09 | 1E+09 | 1E+08 | 1E+09 | 1E+09 | 1E+09 | 0     | 0     | 0     |
| V182     | 1E+08 | 1E+09 | 1E+09 | 1E+06 | 1E+09 | 1E+09 | 1E+07 | 1E+09 | 1E+09 | 1E+09 | 1E+09 | 1E+09 | 1E+09 | 1E+09 | 0     | 0     | 0     |

  

| B) Phage | B425  | B447 | B230 | B235  | B236 | B237  | B245 | B339 | B366 | B397 | B404 | B406 | B471 | B537 | B541 | B542 | B546 |
|----------|-------|------|------|-------|------|-------|------|------|------|------|------|------|------|------|------|------|------|
| FCV-2    | 0     | 0    | 1    | 1     | 1    | 10    | 1    | 0    | 0    | 0    | 0    | 0    | 0    | 0    | 0    | 0    | 0    |
| FCV-3    | 0     | 0    | 1    | 1     | 1    | 10    | 1    | 0    | 0    | 0    | 0    | 0    | 0    | 0    | 0    | 0    | 0    |
| V99      | 0     | 0    | 1    | 1     | 1    | 10    | 1    | 0    | 0    | 0    | 0    | 0    | 0    | 0    | 0    | 0    | 0    |
| FCV-9    | 0     | 0    | 1    | 1     | 1    | 0,1   | 1    | 0    | 0    | 0    | 0    | 0    | 0    | 0    | 0    | 0    | 0    |
| FCV-10   | 0     | 0,01 | 1    | 1     | 1    | 0,1   | 1    | 0,01 | 0    | 0    | 0    | 0    | 0    | 0    | 0    | 0    | 0    |
| FCV-1    | 0     | 0,01 | 1    | 1     | 1    | 10    | 1    | 0,01 | 0    | 0    | 0    | 0    | 0    | 0    | 0    | 0    | 0    |
| FCV-11   | 0     | 1    | 1    | 1     | 1    | 1     | 1    | 0    | 0    | 1    | 0    | 0    | 0    | 0    | 0    | 0    | 0    |
| FCV-20   | 0     | 100  | 1    | 1     | 10   | 10    | 1    | 0    | 0    | 10   | 0    | 0    | 0    | 0    | 0    | 0    | 0    |
| FCV-16   | 0     | 10   | 1    | 1     | 1    | 10    | 10   | 0    | 0    | 10   | 0    | 0    | 0    | 0    | 0    | 0    | 0    |
| VK16     | 0     | 100  | 1    | 1     | 1    | 10    | 10   | 0    | 0    | 100  | 0    | 0    | 0    | 0    | 0    | 0    | 0    |
| VK20     | 0     | 100  | 1    | 10    | 10   | 10    | 10   | 0    | 0    | 100  | 0    | 0    | 0    | 0    | 0    | 0    | 0    |
| VK42     | 0     | 1    | 1    | 0,1   | 1    | 0,1   | 0,1  | 10   | 0    | 1    | 10   | 0    | 0    | 0    | 0    | 0    | 0    |
| VK46     | 0     | 10   | 1    | 0,1   | 1    | 0,1   | 0,1  | 0    | 0    | 10   | 0    | 0    | 0    | 0    | 0    | 0    | 0    |
| VK48     | 0     | 10   | 1    | 1     | 1    | 1     | 1    | 1    | 0    | 100  | 0    | 0    | 0    | 0    | 0    | 0    | 0    |
| VK51     | 0     | 1    | 1    | 0,1   | 0,1  | 1     | 1    | 0    | 1    | 1    | 0    | 0    | 0    | 0    | 0    | 0    | 0    |
| VK52     | 0     | 1    | 1    | 1     | 1    | 10    | 1    | 1    | 0    | 1    | 10   | 0    | 0    | 0    | 0    | 0    | 0    |
| VK53     | 0     | 1    | 1    | 0,01  | 0,1  | 0,001 | 0,01 | 0    | 0    | 10   | 0    | 0    | 0    | 0    | 0    | 0    | 0    |
| VK54     | 0     | 0,1  | 1    | 0,1   | 1    | 1     | 0,1  | 0    | 1    | 0,1  | 0    | 0    | 0    | 0    | 0    | 0    | 0    |
| VK58     | 0     | 0,1  | 1    | 0,1   | 1    | 1     | 0,1  | 0    | 10   | 10   | 0    | 0    | 0    | 0    | 0    | 0    | 0    |
| V156     | 1E-05 | 1    | 1    | 0,1   | 1    | 10    | 1    | 10   | 10   | 10   | 10   | 1    | 10   | 10   | 0,01 | 0    | 0,1  |
| V157     | 0     | 10   | 1    | 0,1   | 1    | 10    | 10   | 100  | 100  | 100  | 100  | 10   | 100  | 100  | 0    | 0    | 10   |
| V158     | 0     | 1    | 1    | 0,1   | 10   | 1     | 1    | 10   | 10   | 10   | 10   | 10   | 10   | 10   | 0,01 | 0    | 0,1  |
| V162     | 10    | 10   | 1    | 1     | 100  | 100   | 1    | 10   | 100  | 10   | 100  | 100  | 100  | 100  | 10   | 10   | 0    |
| V165     | 10    | 100  | 1    | 1     | 100  | 100   | 1    | 10   | 100  | 10   | 100  | 100  | 100  | 100  | 1    | 10   | 0    |
| V167     | 10    | 100  | 1    | 1     | 100  | 100   | 10   | 10   | 100  | 100  | 10   | 100  | 100  | 100  | 0,1  | 10   | 0    |
| V171     | 100   | 1000 | 1    | 10    | 10   | 100   | 1    | 10   | 1000 | 1000 | 100  | 1000 | 1000 | 1000 | 10   | 100  | 0    |
| V175     | 0     | 1    | 1    | 0,01  | 1    | 1     | 0,1  | 1    | 1    | 1    | 0,1  | 1    | 1    | 1    | 0    | 0    | 0,01 |
| V178     | 0     | 1    | 1    | 0,01  | 1    | 1     | 0,1  | 1    | 1    | 1    | 0,1  | 1    | 0,1  | 1    | 0    | 0    | 0,01 |
| V181     | 1     | 100  | 1    | 0,1   | 10   | 10    | 1    | 100  | 100  | 100  | 10   | 100  | 100  | 100  | 0    | 0    | 0    |
| V182     | 0,1   | 1    | 1    | 0,001 | 1    | 1     | 0,01 | 1    | 1    | 1    | 1    | 1    | 1    | 1    | 0    | 0    | 0    |

**Supplementary Table 4.** Conserved domains detected in the predicted phage open reading frames

| ORF       | Name            | Accession  | Description                                                                                                                                                                                 | Interval | Blastp E-value |
|-----------|-----------------|------------|---------------------------------------------------------------------------------------------------------------------------------------------------------------------------------------------|----------|----------------|
| ORF4      | Terminase_GpA   | pfam05876  | Phage terminase large subunit (GpA)                                                                                                                                                         | 44-654   | 1.27e-100      |
| ORF7      | SNF2_N          | pfam00176  | SNF2 family N-terminal domain                                                                                                                                                               | 22-278   | 1.00e-13       |
| ORF8      | ParB            | smart00470 | ParB-like nuclease domain                                                                                                                                                                   | 15-109   | 2.27e-08       |
| ORF9      | PAPS_reductase  | cd01713    | This domain is found in phosphoadenosine phosphosulphate (PAPS) reductase enzymes                                                                                                           | 32-222   | 3.06e-26       |
| ORF10     | STKc_TLK        | cd13990    | Catalytic domain of the Serine/Threonine kinase, Tousled-Like Kinase; STKs catalyze the transfer of the gamma-phosphoryl group from ATP to serine/threonine residues on protein substrates. | 2-37     | 6.53e-03       |
| ORF11     | Phage_portal_2  | pfam05136  | Phage portal protein, lambda family                                                                                                                                                         | 65-402   | 3.47e-33       |
| ORF16     | Peptidase_M15_4 | pfam13539  | D-alanyl-D-alanine carboxypeptidase                                                                                                                                                         | 87-152   | 1.39e-12       |
| ORF21     | S49_Sppa_N_C    | cd07023    | Signal peptide peptidase A (SppA), a serine protease, has catalytic Ser-Lys dyad                                                                                                            | 76-284   | 6.83e-28       |
| ORF23     | Phage_cap_E     | pfam03864  | Phage major capsid protein E                                                                                                                                                                | 22-357   | 3.93e-23       |
| ORF27     | COG4386         | COG4386    | Mu-like prophage tail sheath protein gpL [Mobilome: prophages, transposons]                                                                                                                 | 26-482   | 3.54e-29       |
| ORF31     | tape_meas_TP901 | TIGR01760  | phage tail tape measure protein, TP901 family, core region                                                                                                                                  | 62-409   | 2.41e-19       |
| ORF33     | Baseplate_J     | pfam04865  | Baseplate J-like protein                                                                                                                                                                    | 69-325   | 6.39e-21       |
| ORF34     | DUF2313         | pfam10076  | Uncharacterized protein conserved in bacteria (DUF2313). Members comprise various hypothetical and putative bacteriophage tail proteins                                                     | 40-152   | 3.04e-10       |
| ORF39     | COG4379         | COG4379    | Mu-like prophage tail protein gpP [Mobilome: prophages, transposons];                                                                                                                       | 5-290    | 3.18e-11       |
| ORF42     | PRK12539        | PRK12539   | RNA polymerase sigma factor                                                                                                                                                                 | 16-47    | 9.89e-03       |
| ORF44     | COG5665         | COG5665    | CCR4-NOT transcriptional regulation complex, NOT5 subunit [Transcription]                                                                                                                   | 95-222   | 4.23e-03       |
| ORF46     | RecT            | pfam03837  | RecT family                                                                                                                                                                                 | 24-185   | 3.43e-03       |
| ORF47     | NTP-PPase_u3    | cd11540    | Nucleoside Triphosphate Pyrophosphohydrolase (EC 3.6.1.8) MazG-like domain found in a group of uncharacterized proteins from bacteria and archaea                                           | 8-98     | 4.86e-20       |
| ORF50     | N6_N4_Mtase     | pfam01555  | DNA methylase                                                                                                                                                                               | 463-713  | 2.63e-15       |
| ORF54     | HTH_36          | pfam13730  | Helix-turn-helix domain                                                                                                                                                                     | 17-72    | 1.54e-04       |
| ORF55     | PIF1            | pfam05970  | PIF1-like helicase                                                                                                                                                                          | 4-288    | 2.91e-27       |
| ORF58     | PRK03992        | PRK03992   | proteasome-activating nucleotidase                                                                                                                                                          | 99-141   | 1.54e-03       |
| ORF61*    | NUMOD4          | pfam07463  | NUMOD4 motif                                                                                                                                                                                | 7-55     | 3.38e-11       |
| ORF65     | PRK05733        | PRK05733   | single-stranded DNA-binding protein                                                                                                                                                         | 1-110    | 1.32e-16       |
| ORF66     | CE_PFG1_1_parB  | TIGR03764  | integrating conjugative element, PFG1_1 class, ParB family protein                                                                                                                          | 12-51    | 6.26e-03       |
| ORF67.1** | lipid_A_lpxD    | TIGR01853  | UDP-3-O-[3-hydroxymyristoyl] glucosamine N-acyltransferase LpxD                                                                                                                             | 54-147   | 1.07e-16       |
| ORF74.1** | YopX            | pfam09643  | YopX protein                                                                                                                                                                                | 5-83     | 1.02e-08       |

\*not in phage genomes VK48, VK58, V156, V157

\*\*only in phage genomes V156, V157, V175, V181 and V182

**Supplementary Table 5.** Characterization of CRISPR loci in *Flavobacterium columnare* strains

|                                                                                     | CRISPR1                                             | CRISPR2                                  |
|-------------------------------------------------------------------------------------|-----------------------------------------------------|------------------------------------------|
| Unique spacers                                                                      | 52                                                  | 29                                       |
| Spacers shared among all isolates                                                   | 30/52 (~58%)                                        | 13/29 (~45%)                             |
| Unique spacers matching phage genomes                                               | 18/52 (~35%)                                        | 15/29 (~52%)                             |
| Phage protospacers (PP) with C1 PAM                                                 | 16/18 (~89%)                                        | 8/15 (~53%)                              |
| Change in PP sequence after spacer appearance                                       | 6/18 (~33%)                                         | 9/15 (60%)                               |
| Resurfacing of ancestral PP sequence in phage genomes after disappearance of spacer | 4/6 (~67%)                                          | 3/9 (~33%)                               |
| Unique spacers matching <i>F. columnare</i> genome                                  | 9/52 (~17%)                                         | 2/29 (~7%)                               |
| <i>F. columnare</i> protospacers with C1 PAM                                        | 6/9 (~67%)                                          | 1/2 (50%)                                |
| Spacer target strand (phage)                                                        | 47% coding                                          | 100% coding                              |
| <i>Cas</i> genes                                                                    | <i>Cas9</i> , <i>Cas1</i> , <i>Cas2</i> (type II-C) | <i>Cas13b</i> (type VI-B)                |
| Repeat sequence                                                                     | GTTGTGGTTTGTAAAGA<br>TTAGAAAACACGATATT              | GTTGGGAAAGCCCTTATT<br>TTGAAGGGTATCTACAAC |

**Supplementary Table 6.** 20 nucleotides long DNA regions upstream (5' end) and downstream (3' end) of C1 protospacers using the guide-centric approach<sup>2</sup>. Proposed PAM-sequence marked in bold.

|         | C1 protospacer surrounding regions                                                  |                                                                                      |
|---------|-------------------------------------------------------------------------------------|--------------------------------------------------------------------------------------|
| Spacer  | 20 nt (5' end)                                                                      | 20 nt (3' end)                                                                       |
| C1s33   | GTTTCGCTTCTAAGCATTGG                                                                | <b>AATGCTAAAA</b> ATGTTTCATGT                                                        |
| C1s34   | TATTTTACGCCGATAGAACA                                                                | <b>GATTTTAAAA</b> ATTATTTATT                                                         |
| C1s35   | TTATCATAAGTTAATACAGA                                                                | <b>TGTTTTAAAA</b> AAAAATTGATG                                                        |
| C1s36   | TTTTCTGGTGGTAAAGATAG                                                                | <b>AGCTATAAAA</b> AGAGATAGAA                                                         |
| C1s37   | TCTTTGTCGAACTTTTCTTT                                                                | <b>GTCTTTAAAA</b> ACAATTTCTT                                                         |
| C1s39   | AGAAAATCTTCACCACCTAA                                                                | CTCATTGCATGTACTTTCAC                                                                 |
| C1s40   | TTTATAGATGGAATTGCAAG                                                                | ACGATTCAAAAAATTATACA                                                                 |
| C1s41   | TTTACTCATTAACTGTAATA                                                                | <b>TTAATTAAAA</b> AAGATTCTGG                                                         |
| C1s42   | TGATTCATAATCTTTAATTG                                                                | <b>AAGTATAAAA</b> CAATCCTAAG                                                         |
| C1s44   | GAAAAGTATTAAAAACTTGT                                                                | GGTTATAAATGGTTAACTAA                                                                 |
| C1s45   | AAATAAAGAAAGGTGTCGAA                                                                | <b>AGCRCTAAAA</b> AATCCTACCT                                                         |
| C1s46   | GCAATGAAAGAACAATCAA                                                                 | <b>GAGTTTAAAA</b> GTTTATCAAA                                                         |
| C1s47   | ATTTTGATTTGCCTTGAGT                                                                 | <b>AATTATAAAA</b> ATGGCAGAAA                                                         |
| C1s48   | TGTTTTTTTATTTAATTTTTT                                                               | <b>CATTGTAAAA</b> TATTAATTAA                                                         |
| C1s49   | GCGTGTATTTAAAAGTTTCA                                                                | <b>CCTTTTAAAA</b> TACTACTTTC                                                         |
| C1s50   | TTTCTATTCATTTTGATAGC                                                                | <b>AGGACTAAAA</b> ACAGTTTCTC                                                         |
| C1s51   | TTCCAAAACCTGTTCTTTAT                                                                | <b>TATCATAAAA</b> AACAGCAATT                                                         |
| C1s52   | TGTAAAGATTGTATTGATTT                                                                | <b>GGCATTAAAA</b> TTTTTTCCAT                                                         |
| WebLogo | 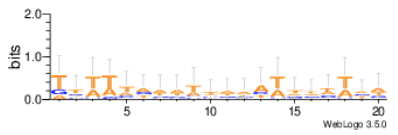 |  |

**Supplementary Table 7.** 20 nucleotide RNA regions (from predicted ORFs) upstream (5' end) and downstream (3' end) of C2 protospacers using the target-centric approach<sup>2</sup>. Sequence outside of predicted transcript in *italic* and sequence identical to the proposed C1 PAM in **bold**. Standard IUPAC codes used in cases of polymorphism between phage genomes.

|         | C2 protospacer surrounding regions                                                  |                                                                                      |
|---------|-------------------------------------------------------------------------------------|--------------------------------------------------------------------------------------|
| Spacer  | 20 nt (5' end)                                                                      | 20 nt (3' end)                                                                       |
| C2s14   | CAAAGAGUUGCAGGAUGGAU                                                                | GUACUAAAUAUAAAUAUG                                                                   |
| C2s16   | AGUUAGAAACAAUCCAGAG                                                                 | <b>AGTGGUAAAA</b> AAAAGAGUGA                                                         |
| C2s17   | UUAGGAUUGUUUUUAUACUUU                                                               | CAAUAAAGAUUAUGAAUCA                                                                  |
| C2s18   | GGGUGAAGUCCUAAACCGM                                                                 | <b>AUAAUUAAAA</b> UGAUACAUU                                                          |
| C2s19   | GCUCAAGAACAAGCCAAAGU                                                                | AAAGUAUAAAAAUGCUUUU                                                                  |
| C2s20   | UACAACUAUUACCUUUGAUU                                                                | <b>GUAUAUAAAA</b> UACAGAAAGC                                                         |
| C2s21   | AAAGUAUUUUUUUAGACCCU                                                                | AAAACCUUUCAUUGAAUUA                                                                  |
| C2s22   | UUAAGAGCCUGUUGUUUAGU                                                                | AGUUAUCAAAAAAAUAUCAA                                                                 |
| C2s23   | AAAAAUACAAUGGCUAUAA                                                                 | <b>AAAUUAAAAA</b> AACAUUGAAU                                                         |
| C2s24   | UUAAAACUAGAGUAAAGCCA                                                                | <b>UGAUUUAAAA</b> AAUGAUGCUG                                                         |
| C2s25   | UUGGCGGGUUUUUAUUGAUU                                                                | ACUAUUUUUUAACCCAAAGG                                                                 |
| C2s26   | AAAUUAUUCUUUUAAAAAA                                                                 | UAUUUACAAAAAAUAAAAUA                                                                 |
| C2s27   | ACCGAAUUUUUGAAAUCAAA                                                                | <b>AGUAUUAAAA</b> ACUUGUUUAG                                                         |
| C2s28   | GAACAUUAGGAAGAAGUAUU                                                                | UUGGGGUAAAAUAAUGGAGU                                                                 |
| C2s29   | AAAAAGAGCGUGCCGAACGU                                                                | <b>CAAUUUAAAA</b> UUAGAAUAAA                                                         |
| WebLogo | 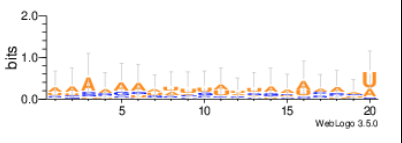 |  |

**Supplementary Table 8.** Spacers targeting the 11 kbp area (27 352 – 38 174 in the consensus sequence) and corresponding changes (“mutations”) in the protospacers.

| Spacer | Protospacer location (consensus) | Presence of spacer in bacteria | Protospacer mutations | Mutated protospacer in phages |
|--------|----------------------------------|--------------------------------|-----------------------|-------------------------------|
| C2s18  | 28 361 – 28 390                  | 2007 (B447) and 2010 (B397)    | 1 SNP                 | 2009-2010                     |
| C1s47  | 29 294 – 29 322                  |                                | <i>none</i>           |                               |
| C2s29  | 30 457 – 30 486                  | 2014 (B546)                    | 12 bp deletion        | 2014                          |
| C2s28  | 32 604 – 32 632                  | 2014 (B546)                    | 2 SNPs                | 2014                          |
| C1s49  | 33 591 – 33 620                  |                                | <i>none</i>           |                               |
| C1s50  | 35 230 – 35 259                  |                                | <i>none</i>           |                               |
| C1s35  | 37 247 – 37 276                  |                                | <i>none</i>           |                               |
| C2s26  | 37 472 – 37 501                  |                                | <i>none</i>           |                               |
| C2s23  | 37 487 – 37 516                  | 2010 (B366)                    | 1 SNP                 | 2010 - 2011                   |

**Supplementary Table 9.** PCR and sequencing primers for phage genome sequencing and amplification of *F. columnare* CRISPR loci.

|                     | Primer     | Sequence                                       |
|---------------------|------------|------------------------------------------------|
| <b>Phage genome</b> | V113Rev7   | TTCCACCATTCCGAACCACC                           |
|                     | EndF       | AATCAAATAAAGCGATATG                            |
|                     | EndR       | TGAATCCTTCTGCAACTTCTTTC                        |
| <b>CRISPR</b>       | CRISPR1 1F | GGACGAGGTTCAACGAAGT (PCR product FWD)          |
|                     | CRISPR1 2F | GATATTTAAATCATCAGTAGT                          |
|                     | CRISPR1 1R | CCCTAAAGCACCACAACCCA (PCR product REV)         |
|                     | CRISPR1 2R | GATTTAACTATTTGTAATAT                           |
|                     | CRISPR1 3R | ACAACGGTAACTTTTAAAT                            |
|                     | CRISPR2 1F | GGTCTAAATACAATTGCTCTTTGACATT (PCR product FWD) |
|                     | CRISPR2 1R | TTAACGCTCGTCCCTCCTTCAA (PCR product REV)       |

## Supplementary Discussion

**Phage genomes.** Genome sequencing of phage isolates from 2009 to 2014 resulted in highly similar sequences with the GC-content varying from 29.7 to 30.0%. Phage genomes showed significant sequence identity to a previously described *F. columnare* phage FCL-2, suggesting that these phages have only recently diverged. Structural proteins were similar to those of marine *Cellulophaga* phages, especially phiSM, as was also reported for FCL-2<sup>3</sup>.

For most of the predicted open reading frames (ORFs) (in phage FCV-3 52 out of 74) no putative function was assigned (Supplementary Table 3). Phage isolates from the year 2009, and three out of five of the 2010 isolates showed almost 100% sequence identity. These phages were assigned to Group 1, as shown in Fig. 2. In the two other 2010 isolates, VK48 and VK58 (Group 2), only very few differences in the nucleotide sequences in seven ORFs (56-62) could be detected, leading to only a few actual amino acid changes in ORFs 56-58 and 61-62. No putative function was predicted for these ORFs, although ORF 56 showed structural similarity to a primase-helicase of T7 and therefore could be involved in the phage replication. ORF 60 was notably different in these phages with only 14% amino acid-similarity. A homology search of the alignment of ORF 60 in FCV-3 and VK48 suggested putative function as a DNA-binding protein. The same differences were seen in the seven ORFs of the isolates from 2011, but in addition (similar to the most recent isolates from 2014 assigned to Group 3), these isolates had extra DNA in the terminal regions of the genomes, leading to increased genome size (46 448 bp in 2009 to 49 121 bp in 2014). The source of the additional DNA is not known but one possibility could be prophages, albeit none were detected during the experiments. Interestingly, the above-mentioned seven ORFs (56-62) in the 2014 isolates were identical to the 2009 isolates (except for a single nucleotide difference in ORF 61).

Single nucleotide differences resulting to change in one amino acid (glutamic acid to lysine) were seen in the 2011 isolates V156 and V157 in ORF 27. This ORF codes for a putative tail protein, having also structural similarity to a tail sheath protein. Two amino acid sequence differences were detected in the subsequent ORF 28, a putative structural protein (valine to isoleucine in both). Changes in both ORFs were identical in these two phages but were missing again in the 2014 isolates. In the 2014 phages (Group 3, except V175), changes identical between the genomes

concentrate on ORF 36 (several differences, including four additional amino acids and one missing) and ORF 37 (three amino acid changes alanine to valine, lysine to arginine and asparagine to histidine) which follow ORFs that contain predicted putative base plate domain (Blastp E-value 6.39e-21) and a tail protein domain (Blastp E-value 3.04e-10) (see Supplementary Table 4) and one hypothetical protein. As tail genes are in many phages clustered and the genes encoding base plate are in many cases by several other tail genes, it is possible that these predicted ORFs are structural. This could partly explain the expansion in host range, as mutations in tail fiber genes are typically associated changes in phage host range.

**CRISPR PAM and PFS sequences.** We searched for protospacer adjacent motifs (PAMS) by analysing 20 bp long regions surrounding each of the 18 C1 protospacers using the guide-centric approach<sup>2</sup>. Alignment of the results with WebLogo<sup>4</sup> revealed a putative 3' PAM with the sequence NNNNNTAAAA (Supplementary Table 6) shared by 15 of the 18 C1 protospacers. This is the longest PAM sequence described to date (10 bp) if the 5 bp linker sequence is included<sup>2</sup>. *Flavobacterium columnare's* C1 PAM was briefly addressed in a previous study<sup>5</sup>, in which the authors report a similar yet truncated version of the sequence described here.

Analysing protospacer flanking sites (PFSs) associated with the 15 C2 RNA-protospacers revealed a preference for U or A in all but one 5' PFSs (Supplementary Table 7). Also, in the 5' PFS of spacer C2s18, A is replaced by C in some of the 2009-2010 phage genomes. These findings are in line with the study by Smargon *et al.*<sup>6</sup>, showing that in type VI-B systems a 5' PFS of A and U enhance interference, while C acts as an inhibitor. In the case of 3' PFSs, either or both previously reported patterns (NAN or NNA) were found in 10 of the 15 C2 protospacers. These phage genomes are, however, high in AT-content (GC%=29.8), which contributes to making such patterns likely.

As C2 contains no known spacer-acquisition related genes, it is possible that spacers are acquired autonomously (possibly by the two transposase-like genes downstream of the repeat-spacer array) or *in trans* by utilizing Cas1 and Cas2 from the C1 locus, as suggested by Smargon *et al.*<sup>6</sup>. If C2 spacer acquisition was dependent on C1 activity, we would expect to detect protospacer-adjacent sequences similar to those found in C1 PAMs, since bias towards specific PAMs is also governed by the acquisition machinery<sup>7, 8</sup>. Surprisingly, almost half (7/15) of the C2 protospacer-adjacent sequences were identical to the proposed C1 PAM consensus NNNNNTAAAA, while the rest had more variability (see Supplementary Table 7). A possible explanation for this variability could be the lack



of selection imposed on these protospacers-adjacent sequences after acquisition. Type VI CRISPR systems are considered to be independent on PAM sequences (only relying on PFSs) <sup>9</sup>, which would indeed not impose these sequences under selection. Our data therefore suggests that in the type VI-B CRISPR locus of *F. columnare*, novel spacers might be acquired by recruiting the acquisition machinery from the adjacent C1 locus, although more specific studies are needed to substantiate this.

**Sampling.** As random field samples, the bacterial isolates in our study may not represent the complete CRISPR spacer pool present in the sampled fish farm's *F. columnare* population. However, the genotype specific infectivity of the phages allows us to dramatically narrow down the possible phage-bacterium interactions, increasing the possibility that even a smaller sample size, compared to, for example, spacer profiling by deep sequencing, is representative of the spacer pool of the specific *F. columnare* genotype at a given time.

## Supplementary References

1. Suomalainen L-R, Kunttu H, Valtonen T, Hirvelä-Koski V, Tiirola M. Molecular diversity and growth features of *Flavobacterium columnare* strains isolated in Finland. *Diseases of Aquatic Organisms* **70**, 55-61 (2006)
2. Leenay RT, Beisel CL. Deciphering, communicating, and engineering the CRISPR PAM. *Journal of Molecular Biology* **429**, 177–191 (2016)
3. Laanto E, Bamford JKH, Ravanti J, Sundberg L-R. The use of phage FCL-2 as an alternative to chemotherapy against columnaris disease in aquaculture. *Frontiers in Microbiology* **6**, 829 (2015)
4. Crooks GE, Hon G, Chandonia JM, Brenner SE. WebLogo: A sequence logo generator. *Genome Research*, **14**, 1188-1190 (2004)
5. Lopatina, A. *et al.* Metagenomic analysis of bacterial communities of Antarctic surface snow. *Frontiers in Microbiology* **7**, 398 (2016).
6. Smargon, A. A., *et al.* Cas13b is a Type VI-B CRISPR-associated RNA-Guided RNase differentially regulated by accessory proteins Csx27 and Csx28. *Molecular Cell*. **65**, 618-630 (2017)
7. Swarts, D. C., Mosterd, C., van Passel, M. W. J., & Brouns, S. J. J. CRISPR interference directs strand specific spacer acquisition. *PloS One* **7**, ne35888 (2012)
8. Wang, J., Li, J., Zhao, H., Sheng, G., Wang, M., Yin, M., & Wang, Y. Structural and mechanistic basis of PAM-dependent spacer acquisition in CRISPR-Cas systems. *Cell*, **163**, 840–853 (2015)
9. Abudayyeh, O. O. *et al.* C2c2 is a single-component programmable RNA-guided RNA-targeting CRISPR effector. *Science* **353**, aaf5573 (2016).
